# Supplementary material for: Geostrophic circulation and tidal effects in the Gulf of Gabès
Source: Copernicus journal article supplement (doi:10.5194/egusphere-2024-3730), 2024-12-13
Supplement: Supplementary file [file egusphere-2024-3730-AC3-supplement.pdf]

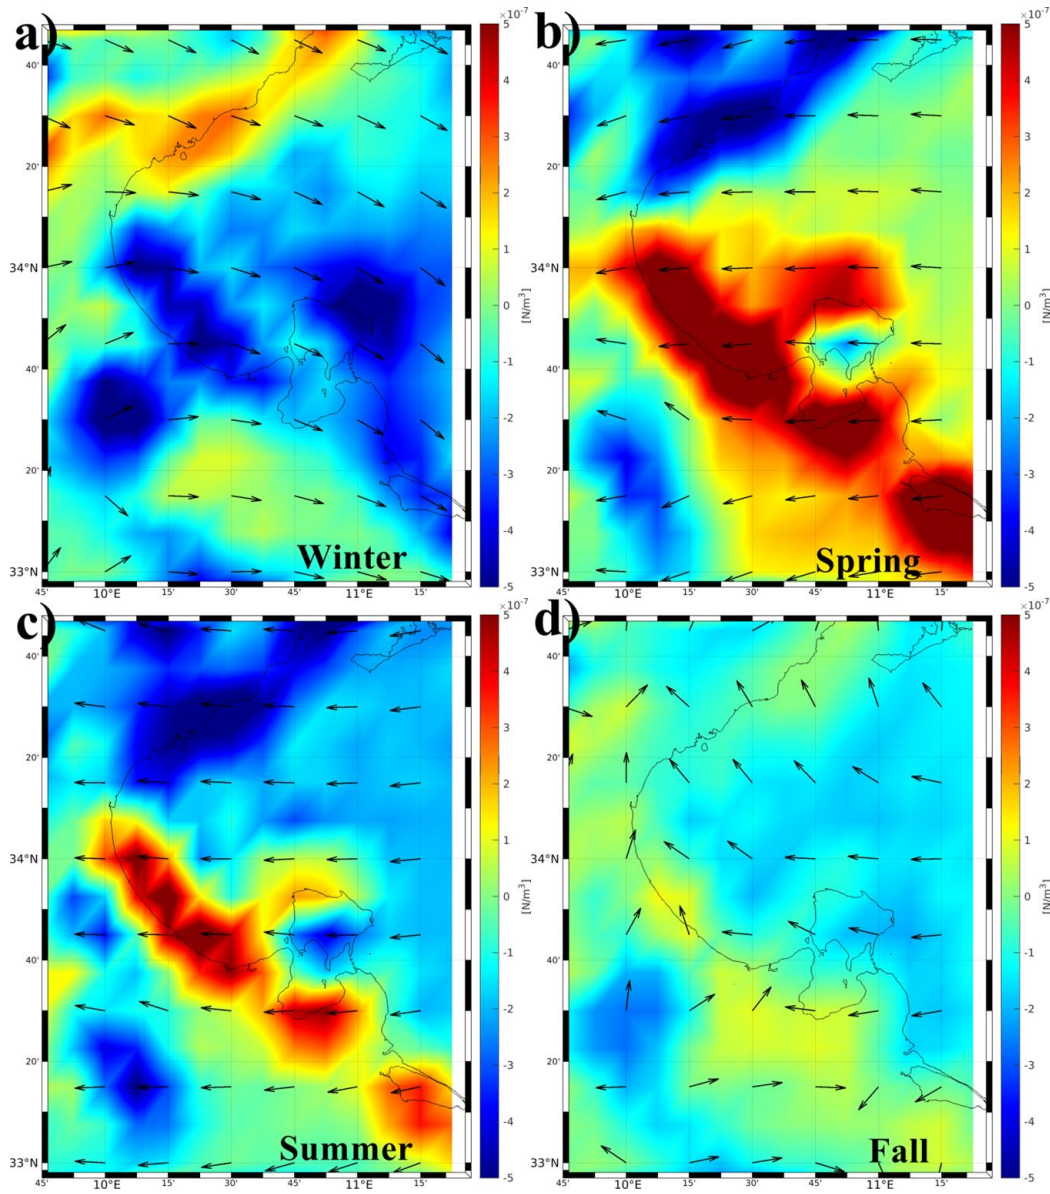

**Figure 1. Seasonal variability of wind stress at 10 m above the Central Gulf of Gabes (CGG) in 2022 computed from ECMWF data (1/8°) superimposed to seasonal wind circulation, in (a) winter, (b) spring, (c) summer and (d) fall.**
